# Supplementary material for: Noninvasive Detection of Microsatellite Instability and High Tumor Mutation Burden in Cancer Patients Treated with PD-1 Blockade
Source: Oxford University Press journal article supplement (doi:10.1158/1078-0432.ccr-19-1372), 2019-09-10
Supplement: 10780432ccr191372-sup-221345_3_supp_5694442_pvtlpt.xlsx [file 10780432ccr191372-sup-221345_3_supp_5694442_pvtlpt.xlsx]

## Sheet: Suppl. Table 3
Supplementary Table 3. Comparison of Microsatellite Status Determined through FFPE Tissue Analyses
FFPE Tissue Analysis		Promega MSI Analysis System
		MSI-H	MSS
125 Gene Targeted Panel	MSI	31	0
	MSS	0	30
