# Supplementary material for: Noninvasive Detection of Microsatellite Instability and High Tumor Mutation Burden in Cancer Patients Treated with PD-1 Blockade
Source: Oxford University Press journal article supplement (doi:10.1158/1078-0432.ccr-19-1372), 2019-09-10
Supplement: 10780432ccr191372-sup-221345_3_supp_5694445_pvtppp.xlsx [file 10780432ccr191372-sup-221345_3_supp_5694445_pvtppp.xlsx]

## Sheet: Suppl. Table 6
Supplementary Table 6. Comparison of Microsatellite Status Determined through Healthy Donor, Contrived, and Clinical Plasma Analyses
Healthy Donors and Contrived Sample Analysis		Expected Status
		MSI-H	MSS
58 Gene Targeted Panel	MSI	18	1
	MSS	2	162
Clinical Plasma Analysis		Tissue MSI Status
		MSI-H	MSS
58 Gene Targeted Panel	MSI	18	0
	MSS	5	6
Clinical Plasma Analysis		Tissue MSI Status
		MSI-H	MSS
58 Gene Targeted Panel (0.5% MAF cutoff)	MSI	17	0
	MSS	2	6
	Indeterminate	4	0
