# Supplementary material for: Noninvasive Detection of Microsatellite Instability and High Tumor Mutation Burden in Cancer Patients Treated with PD-1 Blockade
Source: Oxford University Press journal article supplement (doi:10.1158/1078-0432.ccr-19-1372), 2019-09-10
Supplement: 10780432ccr191372-sup-221345_3_supp_5694447_pvtxpx.xlsx [file 10780432ccr191372-sup-221345_3_supp_5694447_pvtxpx.xlsx]

## Sheet: Suppl. Table 8
Supplementary Table 8. Comparison of Tumor Mutation Burden and Microsatellite Status for Patients Evaluated for Response to Immune Checkpoint Blockade
Response	Tissue		Plasma
	MSI-H	MSS	MSI	MSS
Complete Response	5	0	5	0
Partial Response	5	0	4	1
Stable Disease	2	0	2	0
Progressive Disease	7	6	4	9
Not Evaluable	4	0	3	1
Response	Tissue		Plasma
	TMB-High	TMB-Low	TMB-High	TMB-Low
Complete Response	4	0	5	0
Partial Response	4	0	4	1
Stable Disease	1	1	0	2
Progressive Disease	4	4	1	12
Not Evaluable	2	0	3	1
TMB-H is classified as ≥10 mutations/Mbp sequenced for tissue and ≥50.8 mutations/Mbp sequenced for plasma
